# Supplementary material
Source: PubMed Central journal article supplement (PMC2834175)
Supplement: NIHMS177659-supplement-RottmanAhnSanislowKimOnlineSupplement.pdf [file NIHMS177659-supplement-RottmanAhnSanislowKimOnlineSupplement.pdf]

*Supplemental Table 1. Characteristics of Participants for Prototypic and Comorbid Cases.*

|                                                  | Prototypic Cases | Comorbid Cases<br>DSM Condition | Comorbid Cases<br>FFM Condition |
|--------------------------------------------------|------------------|---------------------------------|---------------------------------|
| Years of Experience and (SD)                     | 19.84<br>(8.85)  | 20.52<br>(8.98)                 | 18.53<br>(8.82)                 |
| Clinical Working Hours per Week and (SD)         | 31.84<br>(11.83) | 33.86<br>(13.21)                | 33.40<br>(13.15)                |
| Hours/Week with Pers. Disorder Patients and (SD) | 10.88<br>(8.13)  | 10.97<br>(9.91)                 | 12.30<br>(10.70)                |
| <b>Gender</b>                                    |                  |                                 |                                 |
| Male                                             | 45.99%           | 46.32%                          | 41.67%                          |
| Female                                           | 50.27%           | 49.47%                          | 57.29%                          |
| No Response                                      | 3.74%            | 4.21%                           | 1.04%                           |
| <b>Degree</b>                                    |                  |                                 |                                 |
| Ph.D.                                            | 29.14%           | 28.42%                          | 30.21%                          |
| Psy.D.                                           | 6.95%            | 4.21%                           | 1.04%                           |
| M.D.                                             | 30.21%           | 32.63%                          | 34.38%                          |
| Masters or<br>higher in S.W.                     | 28.34%           | 24.21%                          | 26.04%                          |
| Unspecified Masters                              | 2.67%            | 6.32%                           | 8.33%                           |
| Other or Unknown                                 | 2.67%            | 4.21%                           | 0.00%                           |
| <b>Theoretical Orientation</b>                   |                  |                                 |                                 |
| Cognitive or Cognitive-Behavioral                | 61.5%            | 70.5%                           | 64.6%                           |
| Psychodynamic                                    | 55.1%            | 61.1%                           | 47.9%                           |
| Interpersonal/System                             | 36.9%            | 39.0%                           | 37.5%                           |
| Eclectic                                         | 35.3%            | 22.1%                           | 34.4%                           |
| Biological                                       | 33.7%            | 35.8%                           | 35.4%                           |

|                    |       |       |       |
|--------------------|-------|-------|-------|
| Behavioral         | 29.4% | 21.1% | 27.1% |
| Humanistic         | 16.6% | 13.7% | 13.5% |
| Psychoanalytic     | 12.8% | 14.7% | 8.3%  |
| Other              | 12.8% | 15.8% | 4.2%  |
| <hr/>              |       |       |       |
| Employment Setting |       |       |       |
| Private Practice   | 70.0% | 75.8% | 70.8% |
| Hopsital           | 31.6% | 29.5% | 38.5% |
| Clinic             | 31.0% | 25.3% | 26.0% |
| Academic Position  | 21.9% | 29.5% | 28.1% |
| Forensics          | 9.6%  | 9.5%  | 9.4%  |
| Other              | 16.6% | 19.0% | 11.5% |
| <hr/>              |       |       |       |

*Supplemental Table 2.* Mean Number of Correct Diagnoses per Personality Disorder for Prototypic Cases.

| Pers. Disorder | FFM  | DSM  | SWAP |
|----------------|------|------|------|
| Cluster A      |      |      |      |
| Paranoid       | 0.43 | 1.00 | 0.80 |
| Schizoid       | 0.65 | 0.88 | 0.58 |
| Schizotypal    | 0.34 | 0.59 | 0.69 |
| Cluster B      |      |      |      |
| Antisocial     | 0.50 | 0.95 | 0.87 |
| Borderline     | 0.41 | 0.95 | 0.94 |
| Histrionic     | 0.29 | 0.78 | 0.56 |
| Narcissistic   | 0.56 | 0.94 | 0.95 |
| Cluster C      |      |      |      |
| Avoidant       | 0.35 | 0.61 | 0.50 |
| Dependent      | 0.53 | 0.82 | 0.82 |
| OCPD           | 0.75 | 0.89 | 0.88 |

*Supplemental Table 3. Mean Number of Incorrect Diagnoses per Personality Disorder for Prototypic Cases.*

| Pers. Disorder | FFM  | DSM  | SWAP |
|----------------|------|------|------|
| Cluster A      |      |      |      |
| Paranoid       | 1.09 | 0.25 | 0.55 |
| Schizoid       | 1.24 | 0.41 | 0.74 |
| Schizotypal    | 1.05 | 1.41 | 0.88 |
| Cluster B      |      |      |      |
| Antisocial     | 1.00 | 0.25 | 1.04 |
| Borderline     | 0.94 | 0.16 | 0.47 |
| Histrionic     | 1.24 | 0.58 | 0.89 |
| Narcissistic   | 0.81 | 0.20 | 0.25 |
| Cluster C      |      |      |      |
| Avoidant       | 1.55 | 1.13 | 1.20 |
| Dependent      | 1.37 | 0.47 | 0.47 |
| OCPD           | 0.80 | 0.28 | 0.30 |

*Supplemental Figures 1a-c. Profiles and Diagnoses of the Three Comorbid Cases*  
in both the *DSM* and FFM Conditions

Note: The disorders shown in brackets associated with each *DSM* symptom were not presented to participants. The FFM profiles presented to participants looked like Figure 1a.

Supplemental Figure 1a: Earnest

**DSM Profile**

Avoids occupational activities that involve significant interpersonal contact, because of fears of criticism, disapproval, or rejection. [Avoidant]

Is inhibited in new interpersonal situations because of feelings of inadequacy. [Avoidant]

Reads hidden demeaning or threatening meanings into benign remarks or events. [Paranoid]

Almost always chooses solitary activities. [Schizoid]

Views self as socially inept, personally unappealing, or inferior to others. [Avoidant]

Is unwilling to get involved with people unless certain of being liked. [Avoidant]

Shows restraint within intimate relationships because of the fear of being shamed or ridiculed. [Avoidant]

Is preoccupied with being criticized or rejected in social situations. [Avoidant]

Lacks close friends or confidants other than first-degree relatives. [Schizoid & Schizotypal]

Has little, if any, interest in having sexual experiences with another person. [Schizoid]

Is unusually reluctant to take personal risks or to engage in any new activities because they may prove embarrassing. [Avoidant]

Neither desires nor enjoys close relationships, including being part of a family. [Schizoid]

**FFM Profile**

Neuroticism Facets

|                    |      |
|--------------------|------|
| Anxiousness        | 4.33 |
| Angry Hostility    | 3.50 |
| Depressiveness     | 4.07 |
| Self-consciousness | 4.54 |
| Impulsivity        | 1.85 |
| Vulnerability      | 3.76 |

Extraversion Facets

|                    |      |
|--------------------|------|
| Warmth             | 1.84 |
| Gregariousness     | 1.47 |
| Assertiveness      | 1.60 |
| Activity           | 2.00 |
| Excitement-Seeking | 1.52 |
| Positive Emotions  | 1.69 |

Openness Facets

|            |      |
|------------|------|
| Fantasy    | 4.07 |
| Aesthetics | 3.00 |
| Feelings   | 2.59 |
| Actions    | 2.79 |
| Ideas      | 3.14 |
| Values     | 1.93 |

Agreeableness Facets

|                     |      |
|---------------------|------|
| Trust               | 1.88 |
| Straightforwardness | 3.01 |
| Altruism            | 2.85 |
| Compliance          | 3.27 |
| Modesty             | 3.83 |
| Tendermindedness    | 3.13 |

Conscientious Facets

|                      |      |
|----------------------|------|
| Competence           | 3.71 |
| Order                | 3.64 |
| Dutifulness          | 3.71 |
| Achievement Striving | 3.75 |
| Self-Discipline      | 3.69 |
| Deliberation         | 3.97 |

**Participant's Diagnoses from the DSM Profile**

|                           |     |
|---------------------------|-----|
| Correct Diagnoses         |     |
| Avoidant                  | 63% |
| Schizoid                  | 42% |
| Incorrect Diagnoses > 10% |     |
| Social Anxiety            | 19% |
| Paranoid                  | 14% |

**Participant's Diagnoses from the FFM Profile**

|                           |     |
|---------------------------|-----|
| Correct Diagnoses         |     |
| Avoidant                  | 32% |
| Schizoid                  | 16% |
| Incorrect Diagnoses > 10% |     |
| Obsessive Compulsive      | 28% |
| Pers. D. or D.            | 23% |
| Anxiety                   | 23% |
| Depression or Dysthymia   | 20% |

Supplemental Figure 1b: Madeline

**DSM Profile**

Requires excessive admiration. [Narcissistic]

Interaction with others is often characterized by inappropriate sexually seductive or provocative behavior. [Histrionic]

Impulsivity in at least two areas that are potentially self-damaging (e.g., spending, sex, substance abuse, reckless driving, binge eating). Note: Do not include suicidal or self-mutilating behavior. [Borderline]

Inappropriate, intense anger or difficulty controlling anger (e.g., frequent displays of temper, constant anger, recurrent physical fights). [Borderline]

Shows arrogant, haughty behaviors or attitudes. [Narcissistic]

Lacks empathy: is unwilling to recognize or identify with the feelings and needs of others. [Narcissistic]

There is evidence of Conduct Disorder with onset before age 15 years. [Antisocial]

Consistently uses physical appearance to draw attention to self. [Histrionic]

Considers relationships to be more intimate than they actually are. [Histrionic]

Is preoccupied with fantasies of unlimited success, power, brilliance, beauty, or ideal love. [Narcissistic]

Is interpersonally exploitative, i.e., takes advantage of others to achieve his or her own ends. [Narcissistic]

Identity disturbance: markedly and persistently unstable self-image or sense of self. [Borderline]

A pattern of unstable and intense interpersonal relationships characterized by alternating between extremes of idealization and devaluation. [Borderline]

Is uncomfortable in situations in which he or she is not the center of attention.

Affective instability due to a marked reactivity of mood (e.g., intense episodic dysphoria, irritability, or anxiety usually lasting a few hours and only rarely more than a few days. [Borderline]

Shows self-dramatization, theatricality, and exaggerated expression of emotion. [Histrionic]

Has a grandiose sense of self-importance (e.g., exaggerates achievements and talents, expects to be recognized as superior without commensurate achievements). [Narcissistic]

**Participant's Diagnoses from the DSM Profile**

|                                         |     |
|-----------------------------------------|-----|
| Correct Diagnoses                       |     |
| Borderline                              | 68% |
| Histrionic                              | 46% |
| Narcissistic                            | 59% |
| Incorrect Diagnoses > 10%               |     |
| Antisocial, Sociopathic or Psychopathic | 39% |

**FFM Profile**

|                             |      |
|-----------------------------|------|
| <b>Neuroticism Facets</b>   |      |
| Anxiousness                 | 2.28 |
| Angry Hostility             | 3.41 |
| Depressiveness              | 2.24 |
| Self-consciousness          | 1.28 |
| Impulsivity                 | 4.08 |
| Vulnerability               | 2.00 |
| <b>Extraversion Facets</b>  |      |
| Warmth                      | 2.26 |
| Gregariousness              | 4.56 |
| Assertiveness               | 4.69 |
| Activity                    | 4.72 |
| Excitement-Seeking          | 4.74 |
| Positive Emotions           | 4.19 |
| <b>Openness Facets</b>      |      |
| Fantasy                     | 2.65 |
| Aesthetics                  | 2.82 |
| Feelings                    | 2.15 |
| Actions                     | 4.14 |
| Ideas                       | 3.19 |
| Values                      | 4.28 |
| <b>Agreeableness Facets</b> |      |
| Trust                       | 2.14 |
| Straightforwardness         | 1.77 |
| Altruism                    | 2.22 |
| Compliance                  | 1.69 |
| Modesty                     | 1.27 |
| Tendermindedness            | 1.60 |
| <b>Conscientious Facets</b> |      |
| Competence                  | 4.35 |
| Order                       | 3.64 |
| Dutifulness                 | 3.00 |
| Achievement Striving        | 4.74 |
| Self-Discipline             | 3.51 |
| aDeliberation               | 2.24 |

**Participant's Diagnoses from the FFM Profile**

|                                         |     |
|-----------------------------------------|-----|
| Correct Diagnoses                       |     |
| Borderline                              | 11% |
| Histrionic                              | 11% |
| Narcissistic                            | 26% |
| Incorrect Diagnoses > 10%               |     |
| Antisocial, Sociopathic or Psychopathic | 34% |
| Bipolar or Manic                        | 22% |

Supplemental Figure 1c: Ted

**DSM Profile**

Lacks empathy: is unwilling to recognize or identify with the feelings and needs of others. [Narcissistic]

Has a grandiose sense of self-importance (e.g., exaggerates achievements and talents, expects to be recognized as superior without commensurate achievements). [Narcissistic]

Shows arrogant, haughty behaviors or attitudes. [Narcissistic]

Deceitfulness, as indicated by repeated lying, use of aliases, or conning others for personal profit or pleasure. [Antisocial]

Neither desires nor enjoys close relationships, including being part of a family. [Schizoid]

Has a sense of entitlement, i.e., unreasonable expectations of especially favorable treatment or automatic compliance with his or her expectations. [Narcissistic]

Lacks close friends or confidants other than first-degree relatives. [Schizoid & Schizotypal]

Reckless disregard for safety of self or others. [Antisocial]

Failure to conform to social norms with respect to lawful behaviors as indicated by repeatedly performing acts that are grounds for arrest. [Antisocial]

Lack of remorse, as indicated by being indifferent to or rationalizing having hurt, mistreated, or stolen from another. [Antisocial]

Believes that he or she is "special" and unique and can only be understood by, or should associate with, other special or high-status people (or institutions). [Narcissistic]

Is interpersonally exploitative, i.e., takes advantage of others to achieve his or her own ends. [Narcissistic]

Irritability and aggressiveness, as indicated by repeated physical fights or assaults. [Antisocial]

**FFM Profile**

Neuroticism Facets

|                    |      |
|--------------------|------|
| Anxiousness        | 1.49 |
| Angry Hostility    | 4.14 |
| Depressiveness     | 2.12 |
| Self-consciousness | 1.38 |
| Impulsivity        | 2.84 |
| Vulnerability      | 1.58 |

Extraversion Facets

|                    |      |
|--------------------|------|
| Warmth             | 1.95 |
| Gregariousness     | 3.45 |
| Assertiveness      | 4.08 |
| Activity           | 4.10 |
| Excitement-Seeking | 4.38 |
| Positive Emotions  | 3.11 |

Openness Facets

|            |      |
|------------|------|
| Fantasy    | 3.03 |
| Aesthetics | 3.22 |
| Feelings   | 2.08 |
| Actions    | 3.85 |
| Ideas      | 3.88 |
| Values     | 2.75 |

Agreeableness Facets

|                     |      |
|---------------------|------|
| Trust               | 1.71 |
| Straightforwardness | 1.16 |
| Altruism            | 1.27 |
| Compliance          | 1.88 |
| Modesty             | 1.40 |
| Tendermindedness    | 1.25 |

Conscientious Facets

|                      |      |
|----------------------|------|
| Competence           | 4.33 |
| Order                | 4.48 |
| Dutifulness          | 3.36 |
| Achievement Striving | 4.00 |
| Self-Discipline      | 3.41 |
| Deliberation         | 3.93 |

**Participant's Diagnoses from the DSM Profile**

|                                                             |     |
|-------------------------------------------------------------|-----|
| Correct Diagnoses                                           |     |
| Antisocial                                                  | 79% |
| Narcissistic                                                | 58% |
| Incorrect Diagnoses > 10%                                   |     |
| Sociopathic or Psychopathic (can be mapped onto Antisocial) | 12% |

**Participant's Diagnoses from the FFM Profile**

|                                     |     |
|-------------------------------------|-----|
| Correct Diagnoses                   |     |
| Antisocial                          | 26% |
| Narcissistic                        | 23% |
| Incorrect Diagnoses > 10%           |     |
| Obsessive-Compulsive Pers. D. or D. | 30% |
| Paranoid                            | 16% |
| Bipolar or Manic                    | 13% |



*Familiarity with DSM as a Covariate in Study 2*

One explanation why participants in the DSM condition reported slightly higher familiarity with the DSM-IV than participants in the FFM condition is that they may have been reminded of the DSM criterial symptoms while looking at the DSM case profiles. In contrast, participants in the FFM condition may have felt less familiar with the DSM after having a difficult time providing correct DSM diagnoses. We ran additional statistical analyses using familiarity with the DSM-IV as a covariate and these analyses confirmed that the difference in familiarity did not lead to any of the main findings in Study 2. These findings are presented below.

*Correct Diagnoses.* Though familiarity with the DSM was a significant predictor of the overall accuracy score,  $F(1,187)=5.15, p=.02$ , the effect of DSM vs. FFM was still significant as well,  $F(1,187)=147.95, p<.01$ .

*Incorrect Diagnoses.* An ANOVA using familiarity with the DSM as a covariate, did not find familiarity with the DSM to be a significant predictor of the number of incorrect diagnoses  $F(1,187)<1$ , and the effect of DSM vs. FFM was still significant  $F(1,187)=19.84, p<.01$ .

*Utility Ratings.* Familiarity with the DSM was a significant predictor of all six utility questions (all  $p$ 's $<.05$ ). However, even with DSM as a covariate, participants still gave significantly higher utility ratings for DSM than FFM for five of the six utility questions (all  $p$ 's $<.05$ ). For the question about communicating with clients, even after accounting for familiarity with the DSM, the average utility rating was still higher for FFM than DSM as was found in the initial analysis, ( $p=.05$ ).
